# Supplementary material for: Ligand-guided homology modelling of the GABAB2 subunit of the GABAB receptor
Source: PLOS journal article supplement (doi:10.1371/journal.pone.0173889), 2017-03-21
Supplement: S2 (10.1371/journal.pone.0173889.s002) [file journal.pone.0173889.s002]

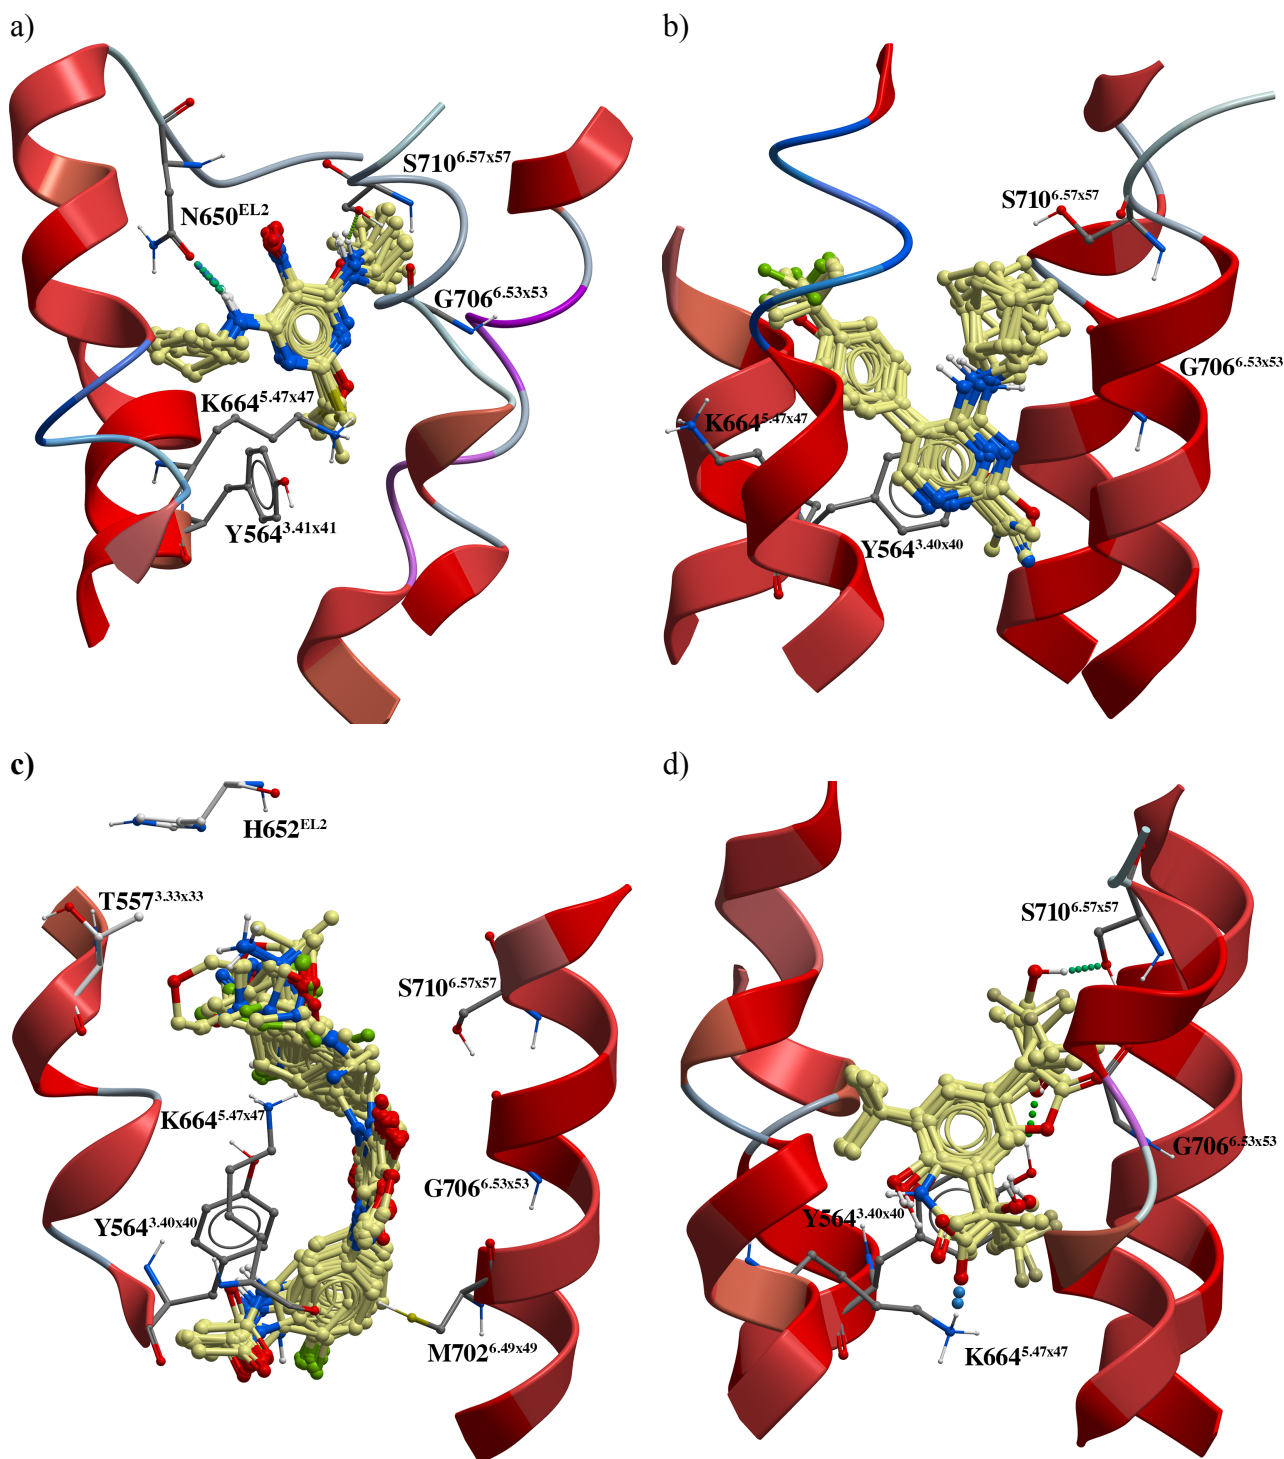

**S2 Fig. PAM docking orientations.** a) Cluster 1 ligands in model C1\_M1\_1U19 (rhodopsin-based model), b) cluster 2 ligands in model C2\_M2\_4OO9 (mGlu5-based model), c) cluster 4 ligands in model C4\_M1\_4OR2 (mGlu1-based model), d) cluster 5 ligands in model C5\_M2\_4OO9 (mGlu5-based model). Intermolecular hydrogen bonds shown as dotted lines. Images generated using ICM software version 3.8-0 (Abagyan and Totrov 1994).
