# Supplementary material for: Ligand-guided homology modelling of the GABAB2 subunit of the GABAB receptor
Source: PLOS journal article supplement (doi:10.1371/journal.pone.0173889), 2017-03-21

**S3 Fig. Superposition of GABA<sub>B2</sub> homology models.** Superimposition of models constructed based on the mGlu1 (PDB id 4OR2) and mGlu5 (PDB id 4OO9) templates. horizontal shift in TM6 (G700<sup>6.47x47</sup>-S710<sup>6.57x57</sup>) in the models highlighted in grey. Images generated using ICM software version 3.8-0 (Abagyan and Totrov 1994)

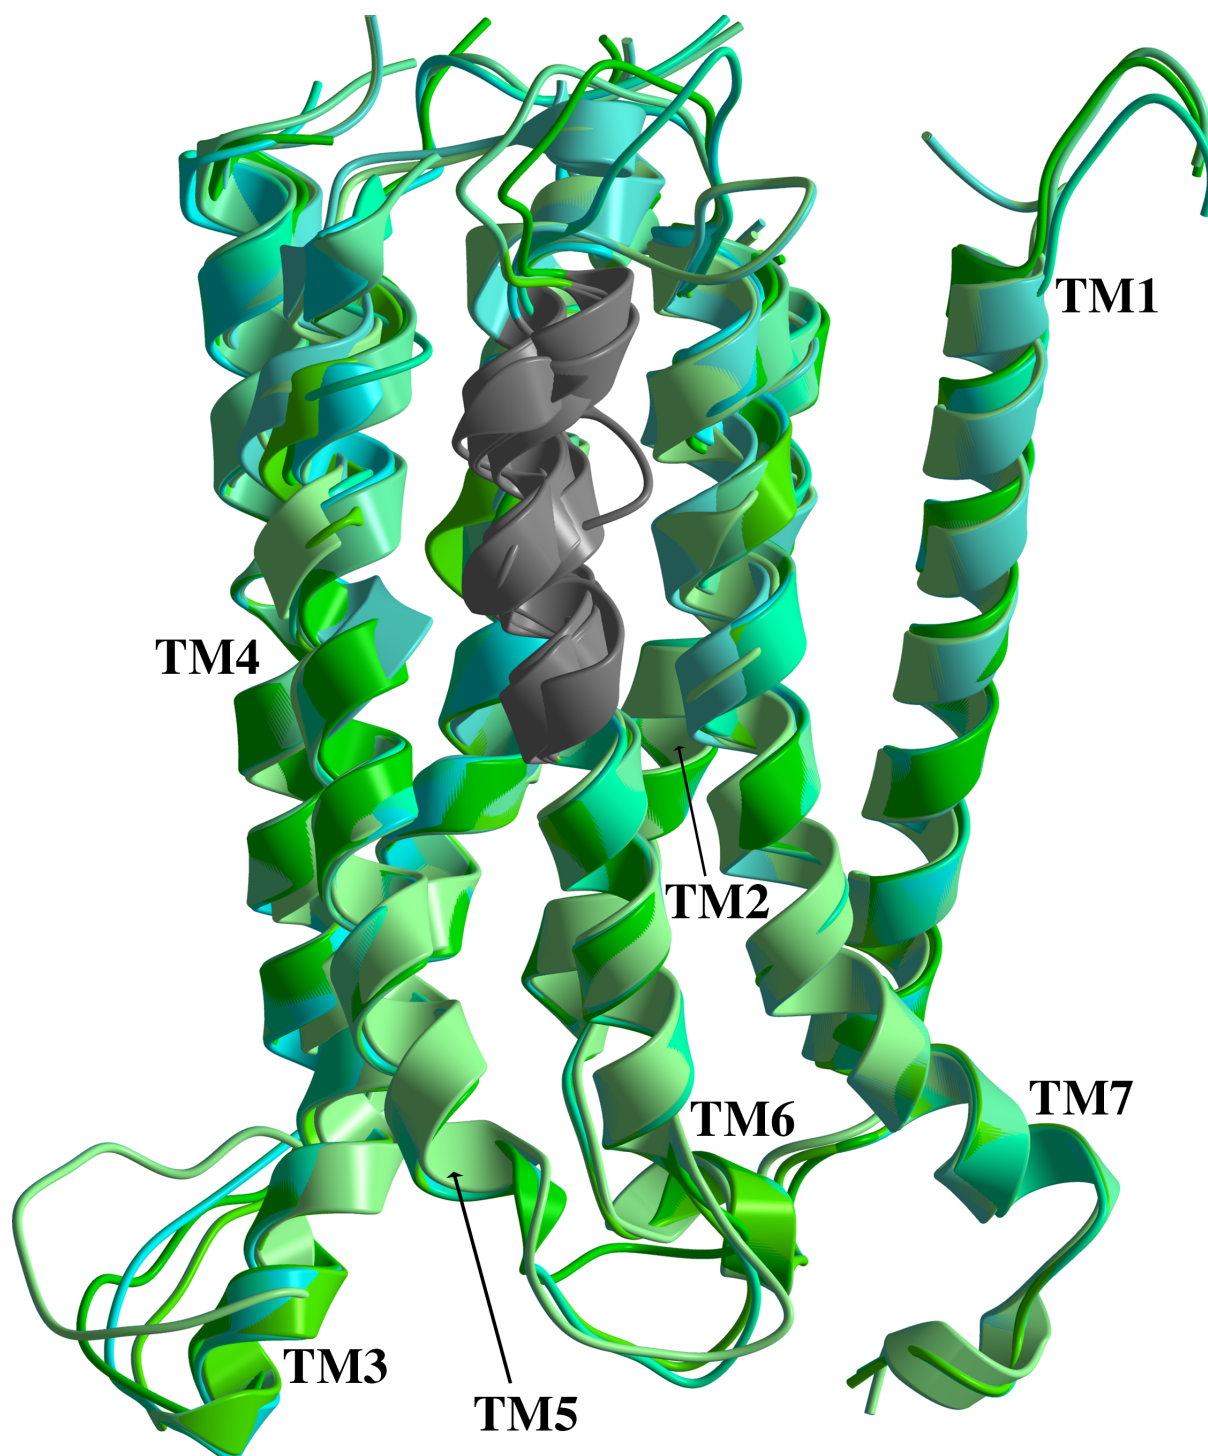

Supplement: S3 (10.1371/journal.pone.0173889.s003) [file journal.pone.0173889.s003]
